# Supplementary material for: Sleep and alertness in shift work disorder: findings of a field study
Source: Springer Nature journal article supplement (doi:10.1007/s00420-018-1386-4), 2018-12-03
Supplement: MOESM1 [file 16311786]

## Sleep and alertness in shift work disorder – findings of a field study

International Archives of Occupational and Environmental Health

Päivi Vanttola<sup>1,2</sup>, Mikko Härmä<sup>1</sup>, Katriina Viitasalo<sup>3</sup>, Christer Hublin<sup>1</sup>, Jussi Virkkala<sup>1</sup>, Mikael Sallinen<sup>1,4</sup>, Kati Karhula<sup>1</sup>, Sampsu Puttonen<sup>1</sup>

<sup>1</sup> Finnish Institute of Occupational Health, Finland; <sup>2</sup> Faculty of Medicine, University of Helsinki, Finland; <sup>3</sup> Finnair Health Services, Finland; <sup>4</sup> Department of Psychology, University of Jyväskylä, Finland

E-mail: paivi.vanttola@ttl.fi

### Supplementary material

Supplementary table 1 Shift-specific questions on insomnia and sleepiness

| Questions/symptoms                                                                        | Sub-questions                      | never/<br>rarely | rather<br>rarely | rather<br>often | often/<br>continuously | not<br>applicable |
|-------------------------------------------------------------------------------------------|------------------------------------|------------------|------------------|-----------------|------------------------|-------------------|
| 1. How often do you experience difficulties in initiating sleep in relation to            | i) morning shifts?                 | ( )              | ( )              | ( )             | ( )                    | ( )               |
|                                                                                           | ii) evening shifts?                | ( )              | ( )              | ( )             | ( )                    | ( )               |
|                                                                                           | iii) night shifts?                 | ( )              | ( )              | ( )             | ( )                    | ( )               |
|                                                                                           | iv) two weeks of being on holiday? | ( )              | ( )              | ( )             | ( )                    | ( )               |
| 2. How often do you awaken during a sleep period in relation to                           | i) morning shifts?                 | ( )              | ( )              | ( )             | ( )                    | ( )               |
|                                                                                           | ii) evening shifts?                | ( )              | ( )              | ( )             | ( )                    | ( )               |
|                                                                                           | iii) night shifts?                 | ( )              | ( )              | ( )             | ( )                    | ( )               |
|                                                                                           | iv) two weeks of being on holiday? | ( )              | ( )              | ( )             | ( )                    | ( )               |
| 3. How often do you experience difficulties falling asleep after awakening in relation to | i) morning shifts?                 | ( )              | ( )              | ( )             | ( )                    | ( )               |
|                                                                                           | ii) evening shifts?                | ( )              | ( )              | ( )             | ( )                    | ( )               |
|                                                                                           | iii) night shifts?                 | ( )              | ( )              | ( )             | ( )                    | ( )               |
|                                                                                           | iv) two weeks of being on holiday? | ( )              | ( )              | ( )             | ( )                    | ( )               |
| 4. How often do you experience non-restorative sleep in relation to                       | i) morning shifts?                 | ( )              | ( )              | ( )             | ( )                    | ( )               |
|                                                                                           | ii) evening shifts?                | ( )              | ( )              | ( )             | ( )                    | ( )               |
|                                                                                           | iii) night shifts?                 | ( )              | ( )              | ( )             | ( )                    | ( )               |
|                                                                                           | iv) two weeks of being on holiday? | ( )              | ( )              | ( )             | ( )                    | ( )               |
| 5. How often do you experience daytime sleepiness in relation to                          | i) morning shifts?                 | ( )              | ( )              | ( )             | ( )                    | ( )               |
|                                                                                           | ii) evening shifts?                | ( )              | ( )              | ( )             | ( )                    | ( )               |
|                                                                                           | iii) night shifts?                 | ( )              | ( )              | ( )             | ( )                    | ( )               |
|                                                                                           | iv) two weeks of being on holiday? | ( )              | ( )              | ( )             | ( )                    | ( )               |
| 6. How often do you experience difficulties in staying awake at work in relation to       | i) morning shifts?                 | ( )              | ( )              | ( )             | ( )                    | ( )               |
|                                                                                           | ii) evening shifts?                | ( )              | ( )              | ( )             | ( )                    | ( )               |
|                                                                                           | iii) night shifts?                 | ( )              | ( )              | ( )             | ( )                    | ( )               |

Criteria for SWD and non-SWD groups: SWD cases had to report at least four of the symptoms (Questions 1–5) ‘never/rarely’ or ‘rather rarely’ after two weeks on holiday (iv). In addition, they had to have at least one of the ‘never/rarely’ or ‘rather rarely’ occurring symptoms (Questions 1–5) or difficulties in staying awake at work (Question 6) ‘often/continuously’ in connection with some shift (i – iii). The non-SWD group was composed of those who reported at least five of the six symptoms as ‘never/rarely’ or ‘rather rarely’ in relation to all shifts (Questions 1–6) and on holiday (Questions 1–5). Those who reported at least four of the five symptoms (Questions 1–5) as ‘never/rarely’ or ‘rather rarely’ in relation to all shifts (Questions 1–5) and on holiday (Questions 1–5) were also included in the non-SWD group. In this case, they had to ‘never/rarely’ or ‘rather rarely’ have difficulties in staying awake at work in relation to all shifts (Question 6: i – iii).

Supplementary table 2 Work shift characteristics of the participants having morning shifts (n = 30), evening shifts (n = 31), and night shifts (n = 26)

|                         | Median | (IQR)  |
|-------------------------|--------|--------|
| Morning shifts          |        |        |
| Monthly number          | 6.3    | (3.3)  |
| Shift start time (h:mm) | 6:00   | (0:19) |
| Shift end time (h:mm)   | 15:46  | (1:14) |
| Evening shifts          |        |        |
| Monthly number          | 4.1    | (1.7)  |
| Shift start time (h:mm) | 14:00  | (0:30) |
| Shift end time (h:mm)   | 00:00  | (0:40) |
| Night shifts            |        |        |
| Monthly number          | 5.1    | (1.5)  |
| Shift start time (h:mm) | 21:15  | (2:30) |
| Shift end time (h:mm)   | 6:00   | (0:30) |
| Number of consecutive   |        |        |
| Days off                | 2.0    | (0.5)  |
| Morning shifts          | 2.0    | (1.5)  |
| Evening shifts          | 2.0    | (2.0)  |
| Night shifts            | 2.0    | (2.0)  |

Supplementary table 3 Fragmentation index of sleep among shift workers with and without SWD

|                       | SWD group |      |    | Non-SWD group |      |   | Group <sup>a</sup> |      |       |
|-----------------------|-----------|------|----|---------------|------|---|--------------------|------|-------|
|                       | Mean      | (SD) | n  | Mean          | (SD) | n | df                 | F    | p     |
| Days off              | 25        | (8)  | 22 | 17            | (8)  | 9 | 27.970             | 4.00 | 0.055 |
| Before morning shifts | 28        | (13) | 22 | 19            | (5)  | 8 | 28.585             | 3.94 | 0.057 |
| After evening shifts  | 25        | (10) | 22 | 21            | (7)  | 9 | 23.210             | 0.91 | 0.349 |
| After night shifts    | 21        | (9)  | 18 | 18            | (9)  | 8 | 21.481             | 1.00 | 0.328 |

<sup>a</sup> Linear mixed model for repeated measurements with Group and Age as main effects
